# Supplementary material
Source: publisher site journal article supplement (https://static.cambridge.org/content/id/urn:cambridge.org:id:article:S0899823X19003532/resource/name/S0899823X19003532supp001.docx)
Supplement: Supplementary file 1 [file S0899823X19003532supp001.docx]

APPENDIX 1 Search terms utilized in MEDLINE


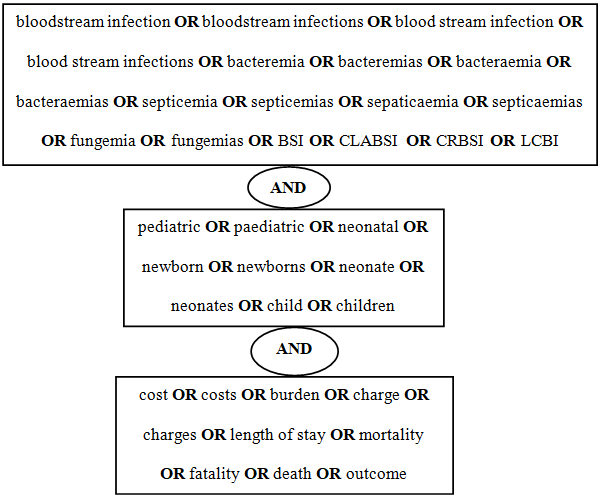


APPENDIX 2 Attributable length of stay (LOS), Funnel Plot with 95% confidence limits. *SE* standard error

0

2

4

6

8

0

10

20

30

40

Mean attributable LOS days

SE of mean attributable LOS days
